# Supplementary material for: Most Monogenic Disorders Are Caused by Mutations Altering Protein Folding Free Energy
Source: MDPI journal article supplement (doi:10.3390/ijms25041963), 2024-02-06
Supplement: s1 [file s1]

# **Most monogenic disorders are caused by mutations altering protein folding free energy**

**Preeti Pandey<sup>1</sup> and Emil Alexov<sup>1,\*</sup>**

Department of Physics and Astronomy, Clemson University, Clemson, SC 29634, USA

\* Correspondence: Corresponding author email: [calexov@clemson.edu](mailto:calexov@clemson.edu)

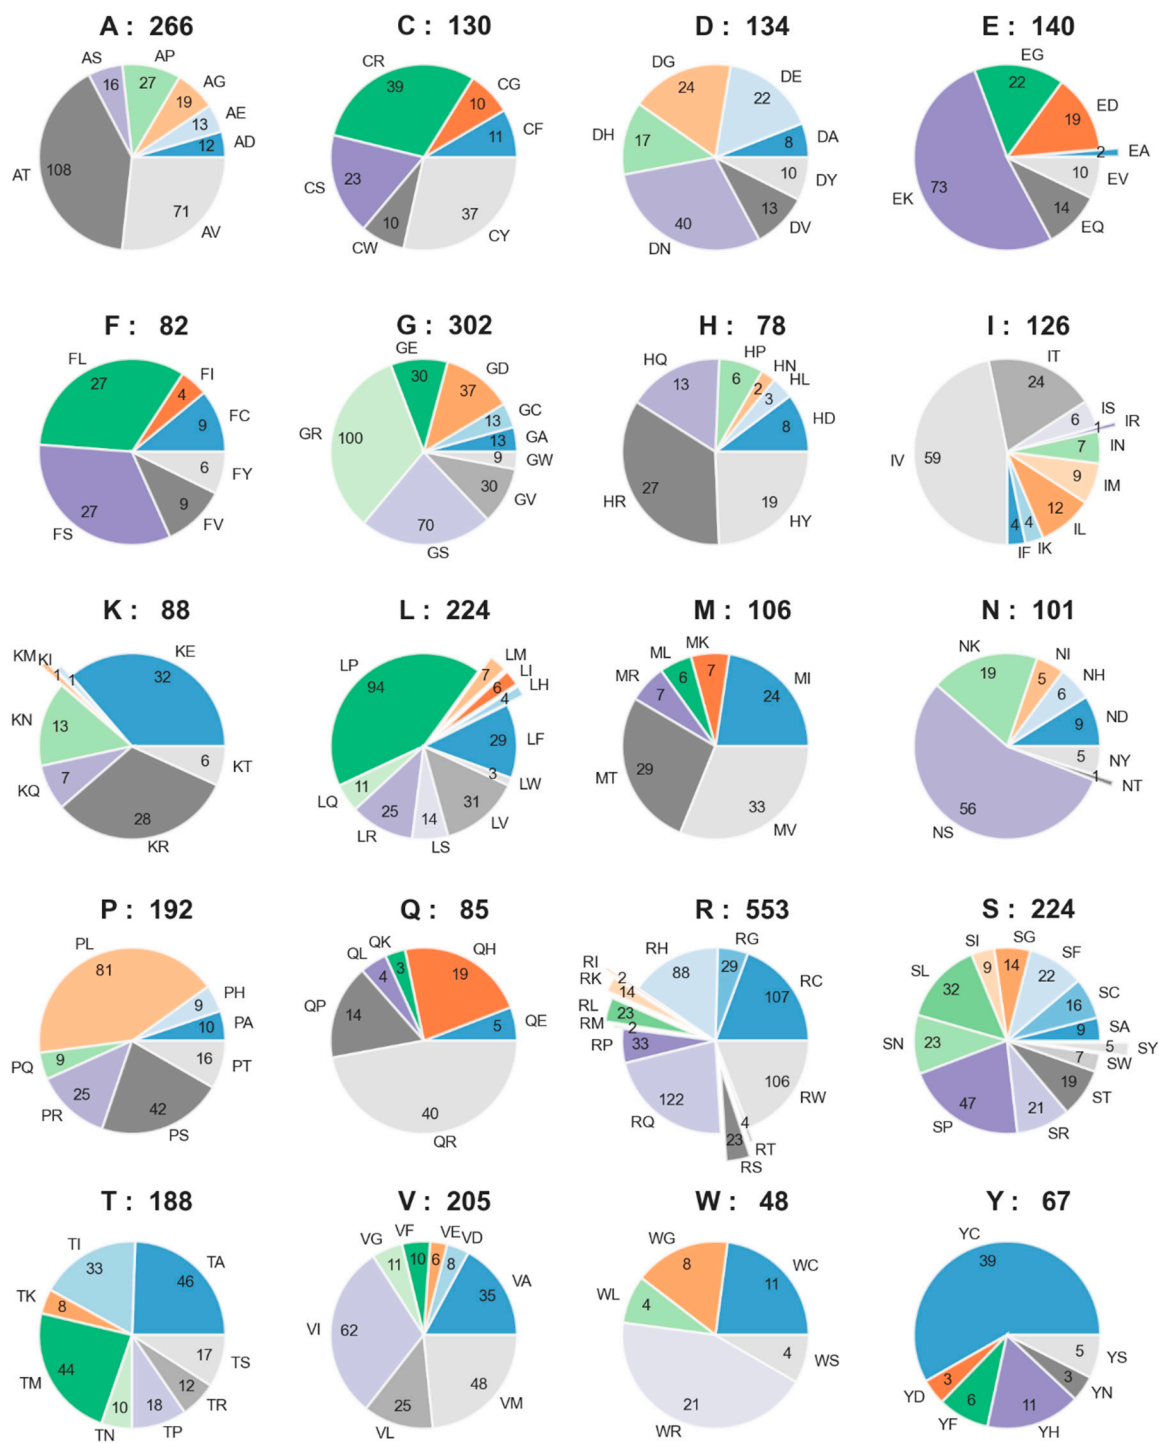

(a)

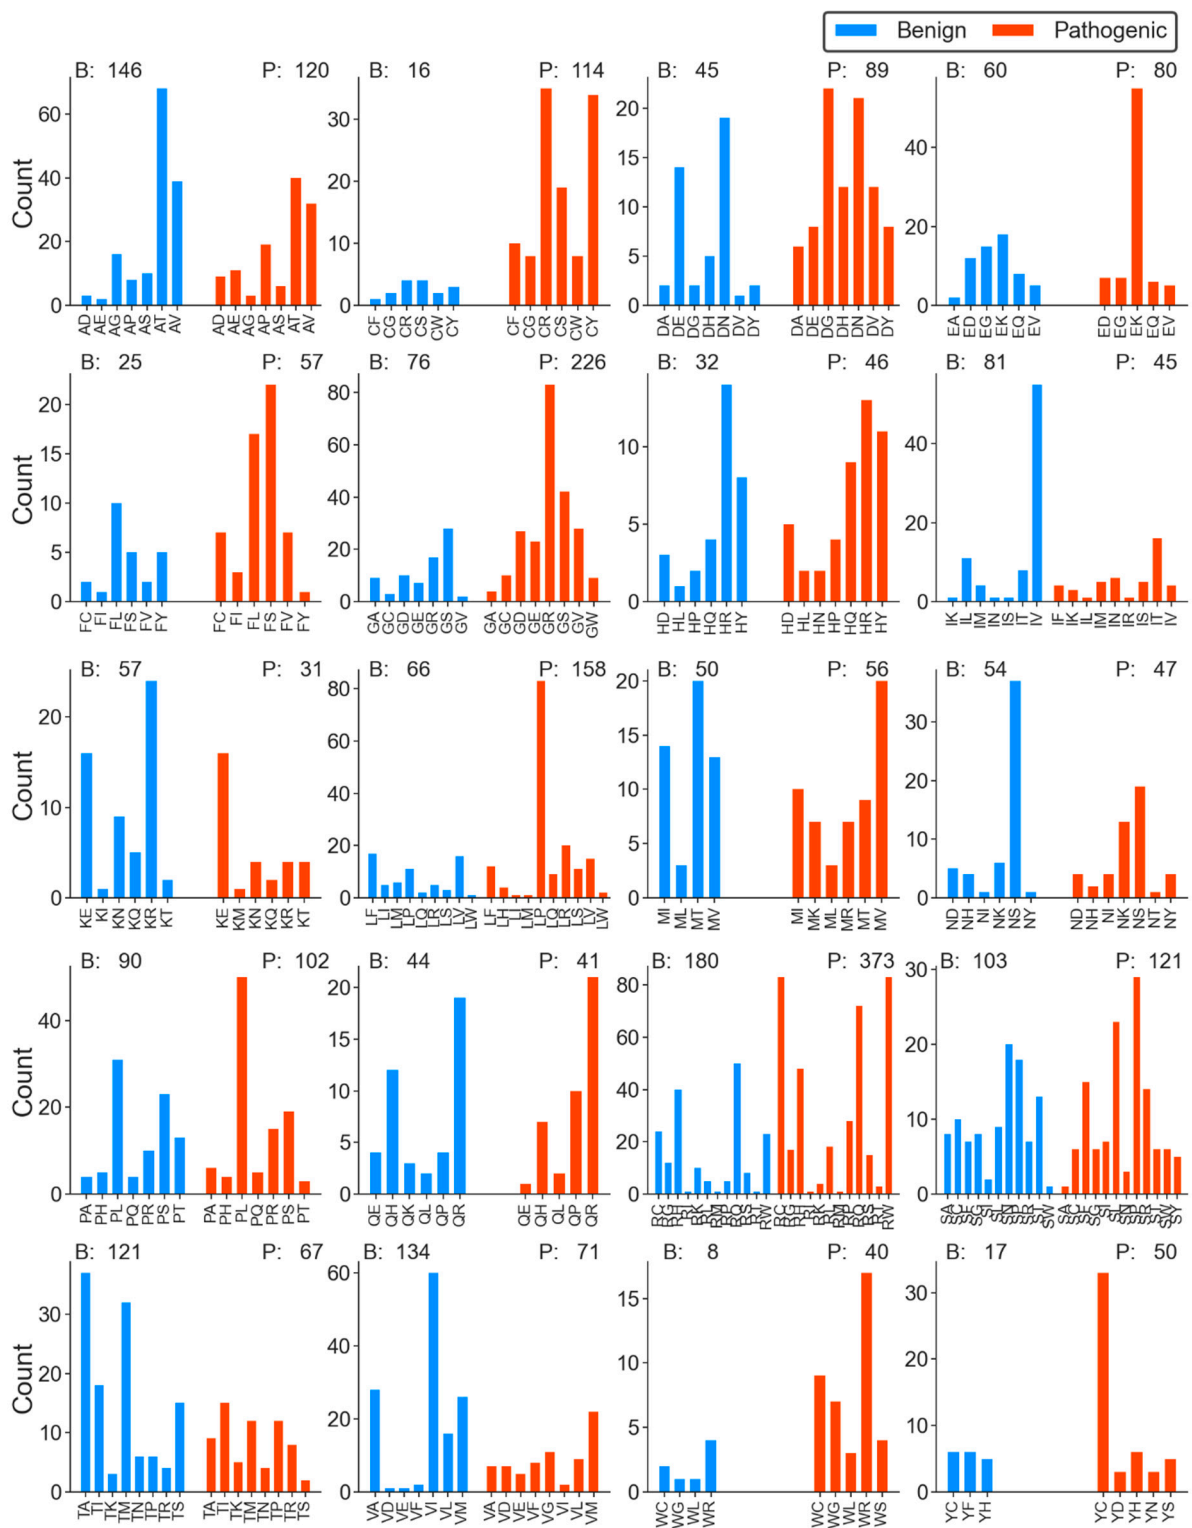

(b)

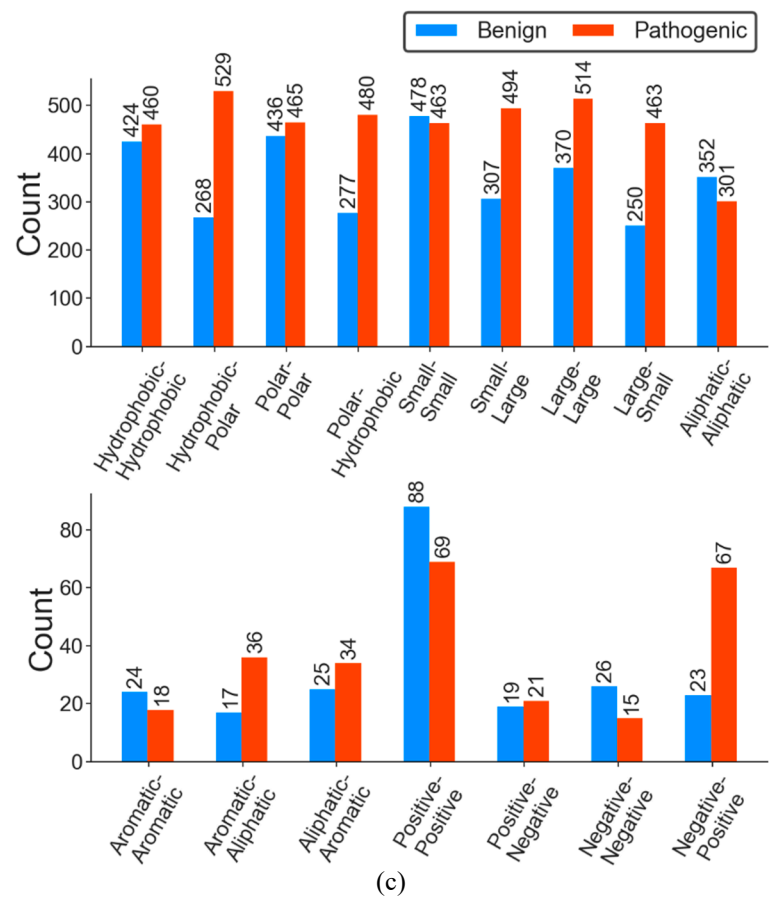

(c)



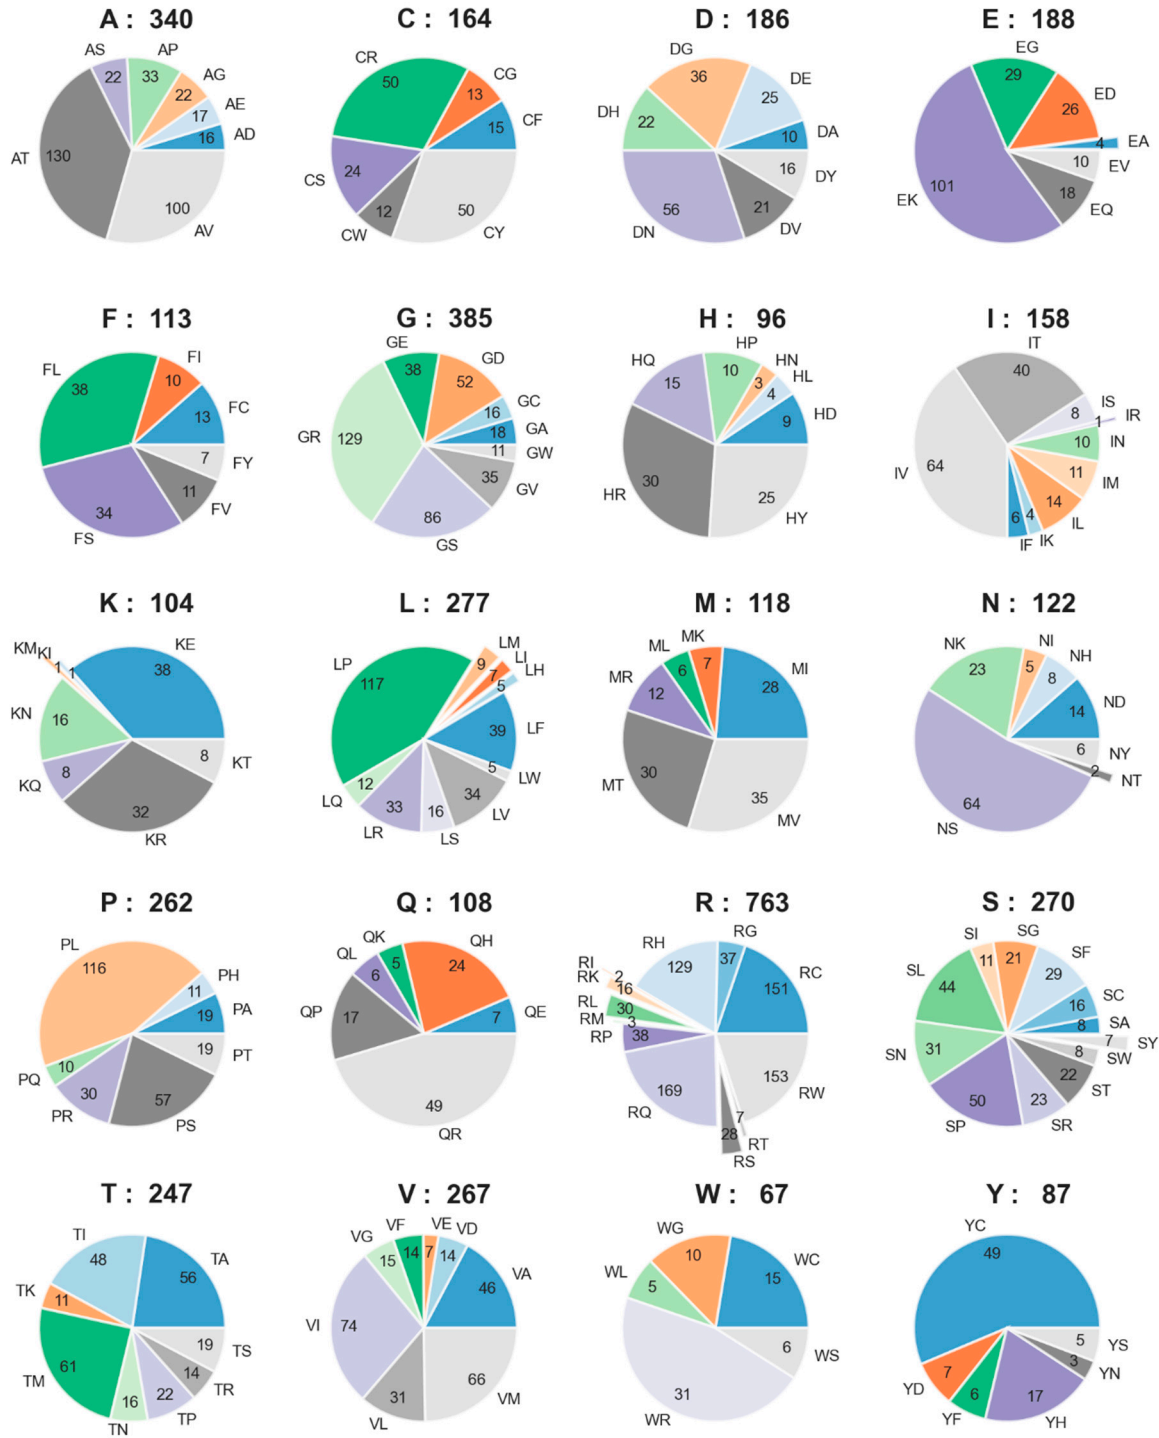

(d)

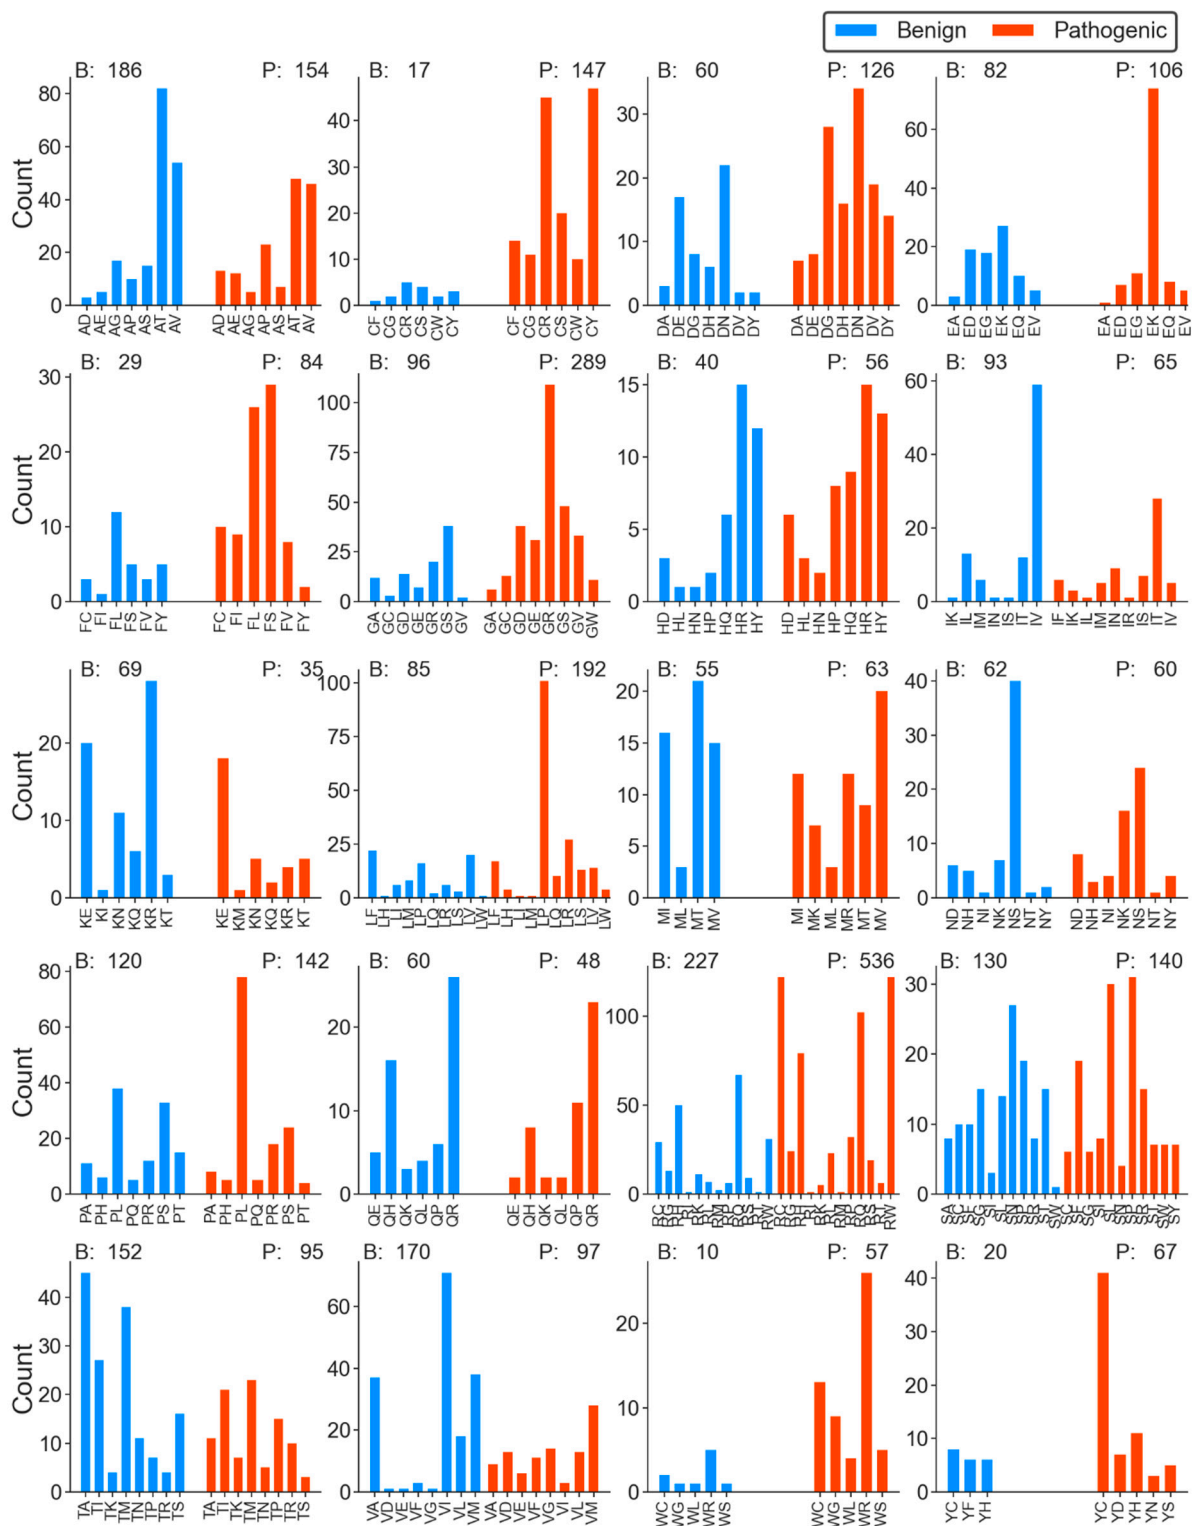

(e)

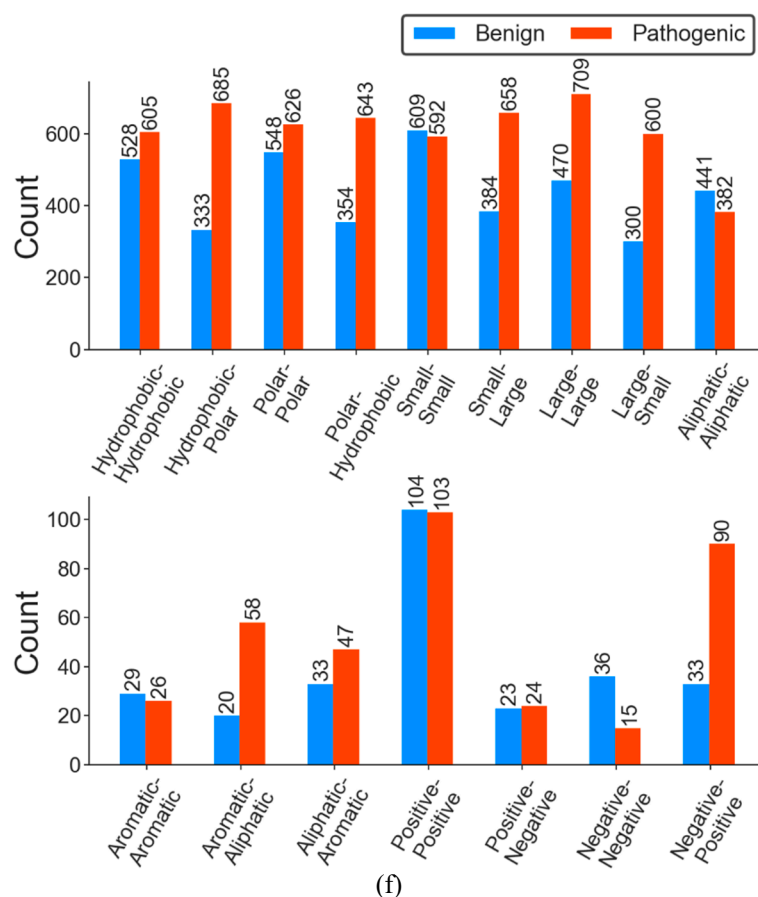

(f)

Figure S1. (a). Pie-chart summarising count of different amino acid mutations in the Monogenic Disorder Dataset 1 (no likely cases). In each subplot, the title shows the count of wild-type amino acids in the whole dataset, and the two-letter label of every pie-chart denotes the one-letter codes of the wild-type and mutant amino acid pair, respectively. (b). Bar plots summarising count of benign and pathogenic mutations in the Monogenic Disorder Dataset 1 (no likely cases). The two-letter label of every bar denotes the one-letter codes of the wild-type and mutant amino acid pairs, respectively. B denotes benign and P denotes pathogenic mutations. (c). Benign vs. pathogenic mutations assigned according to the property of amino acid mutation in the Monogenic Disorder Dataset 1 (no likely cases). The two-word label in the bar plot represents the chemical nature of the wild-type and mutant residues pairs, respectively. The amino acids according to their chemical properties are categorised as follows: Ala, Cys, Gly, Ile, Leu, Met, Phe, Pro, Trp, and Val are categorised as hydrophobic. Asp, Glu, Lys, Arg, His, Asn, Gln, Ser, Thr, and Tyr are categorised as polar. His, Phe, Trp, and Tyr as aromatic. Ala, Ile, Lys, Leu, Met, Pro, and Val as aliphatic. His, Lys, Arg as positive. Asp, and Glu as negative. Ala, Cys, Gly, Ser, Asn, Asp, Pro, Thr, and Val as small. And Arg, Gln, Glu, His, Ile, Leu, Lys, Met, Phe, Trp, and Tyr as large amino acids. (d). Pie-chart summarising count of different amino acid mutations in the Monogenic Disorder Dataset 2 (including likely cases). In each subplot, the title shows the count of wild-type amino acids in the whole dataset, and the two-letter label of every pie-chart denotes the one-letter codes of the wild-type and mutant amino acid pair, respectively. (e). Bar plots summarising count of benign and pathogenic mutations in the Monogenic Disorder Dataset 2 (including likely cases). The two-letter label of every bar denotes the one-letter codes of the wild-type and mutant amino acid pairs, respectively. B denotes benign and P denotes pathogenic mutations. (f). Benign vs. pathogenic mutations assigned according to the property of amino acid mutation in the Monogenic Disorder Dataset 2 (including likely cases). The two-word label in the bar plot represents the chemical nature of the wild-type and mutant residues pairs, respectively. The amino acids according to their chemical properties are categorised as follows: Ala, Cys, Gly, Ile, Leu, Met, Phe, Pro, Trp, and Val are categorised as hydrophobic. Asp, Glu, Lys, Arg, His, Asn, Gln, Ser, Thr, and Tyr are categorised as polar. His, Phe, Trp, and Tyr as aromatic. Ala, Ile, Lys, Leu, Met, Pro, and Val as aliphatic. His, Lys, Arg as positive. Asp, and Glu as negative. Ala, Cys, Gly, Ser,

Asn, Asp, Pro, Thr, and Val as small. And Arg, Gln, Glu, His, Ile, Leu, Lys, Met, Phe, Trp, and Tyr as large amino acids.

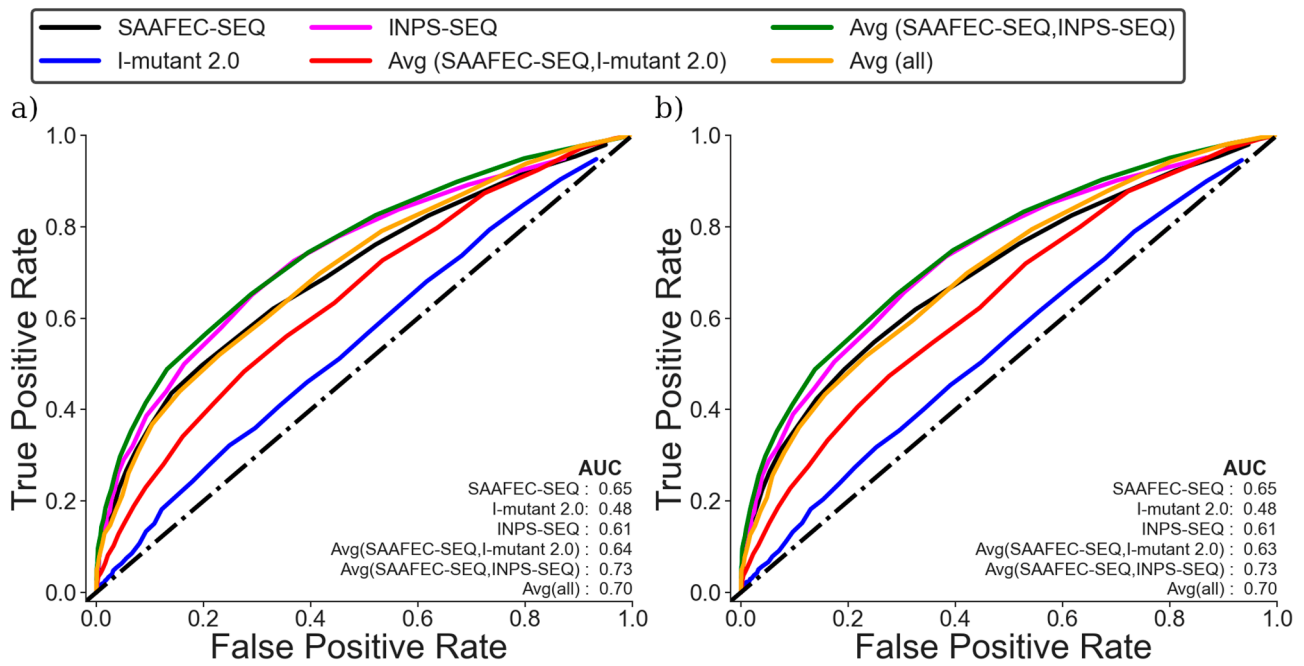

Figure S2. ROC curve for monogenic disorder dataset using absolute  $\Delta\Delta G$  values. (a) Monogenic Disorder Dataset 1 (no likely cases) (b) Monogenic Disorder Dataset 2 (including likely cases).

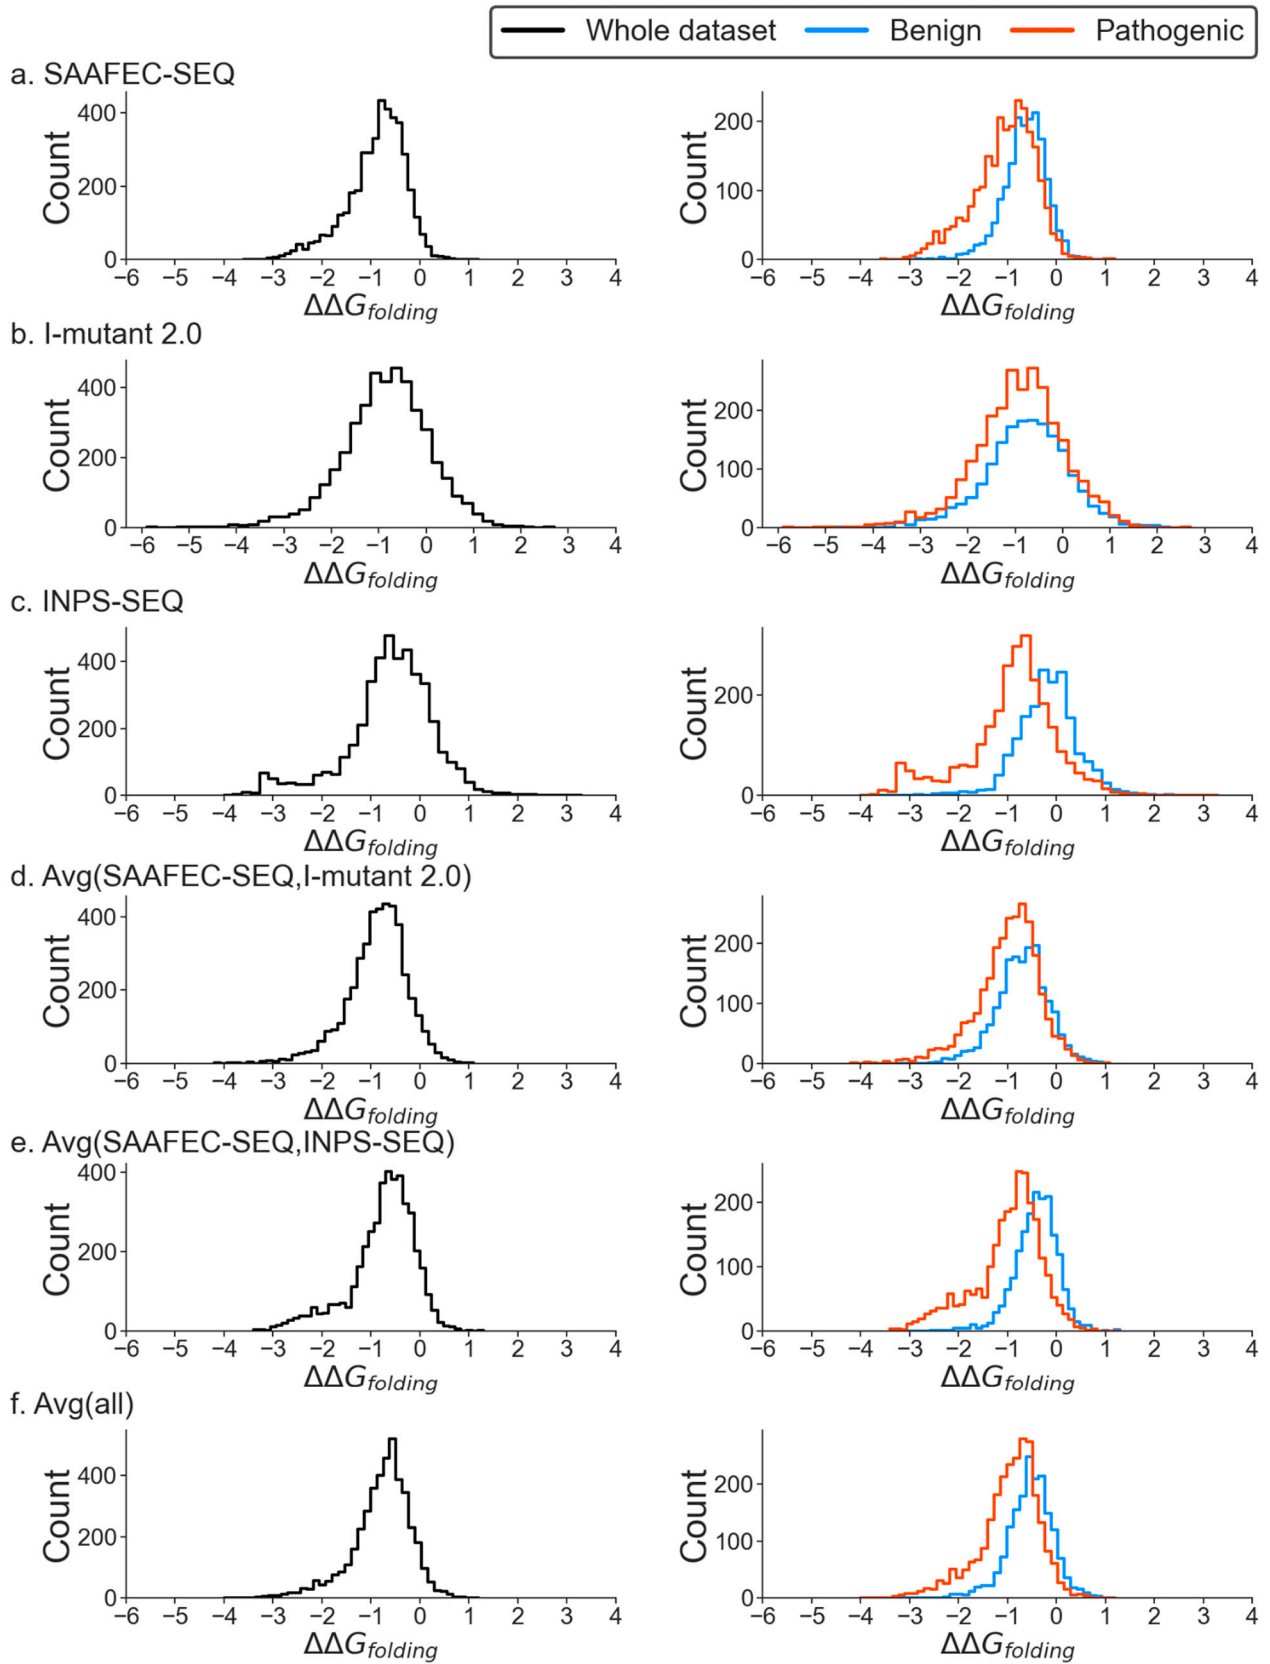

Figure S3. Distribution of change in folding free energy using different predictors using Monogenic Disorder Dataset 2 (including likely cases).



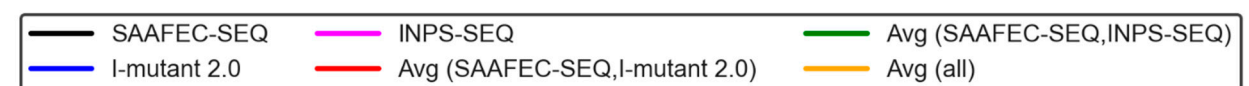

a) Hydrophobic-Hydrophobic

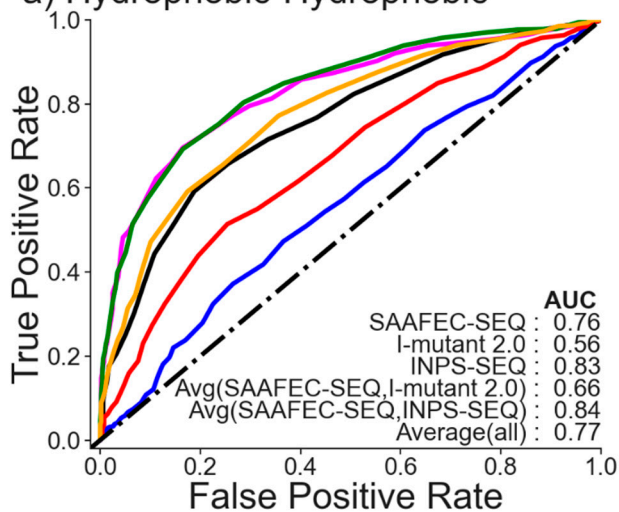

b) Hydrophobic-Polar

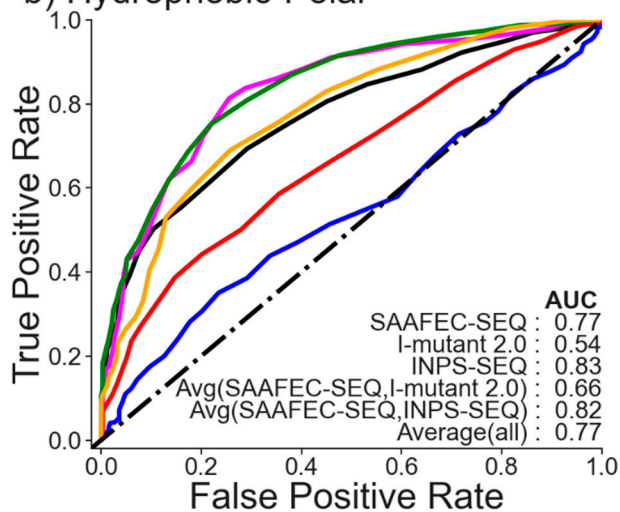

c) Polar-Polar

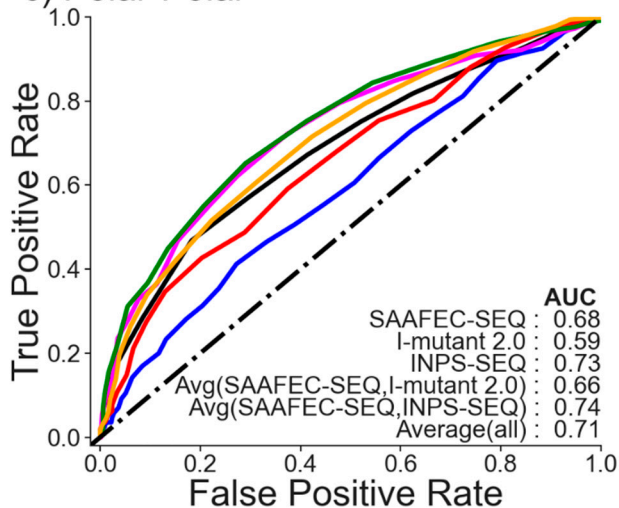

d) Polar-Hydrophobic

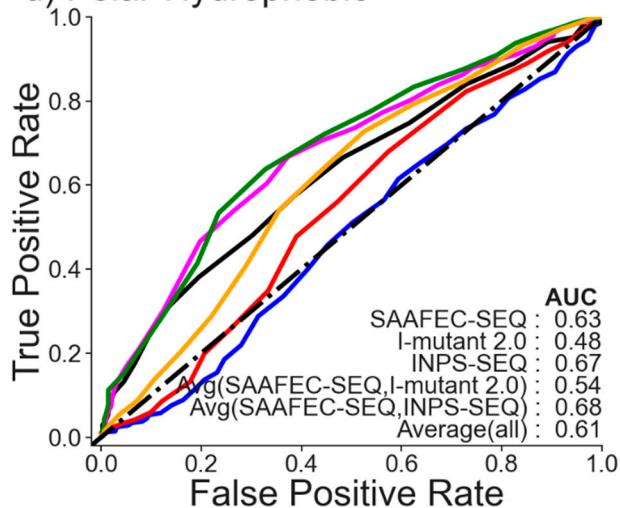

e) Small-Small

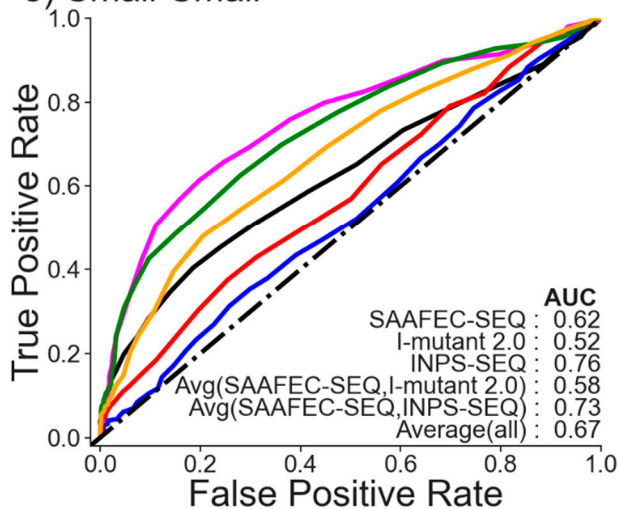

f) Small-Large

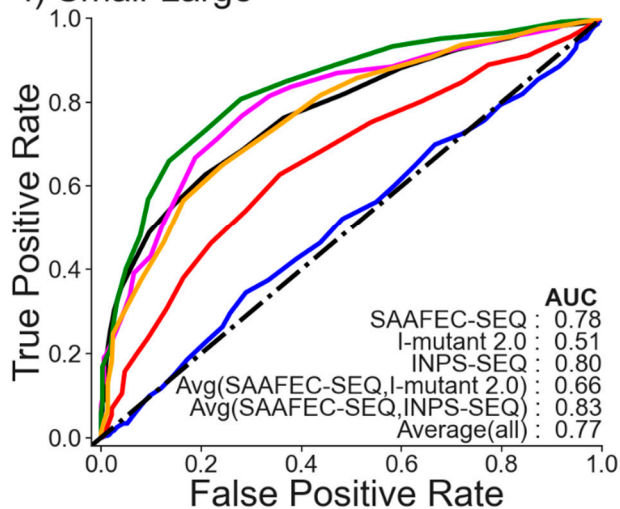

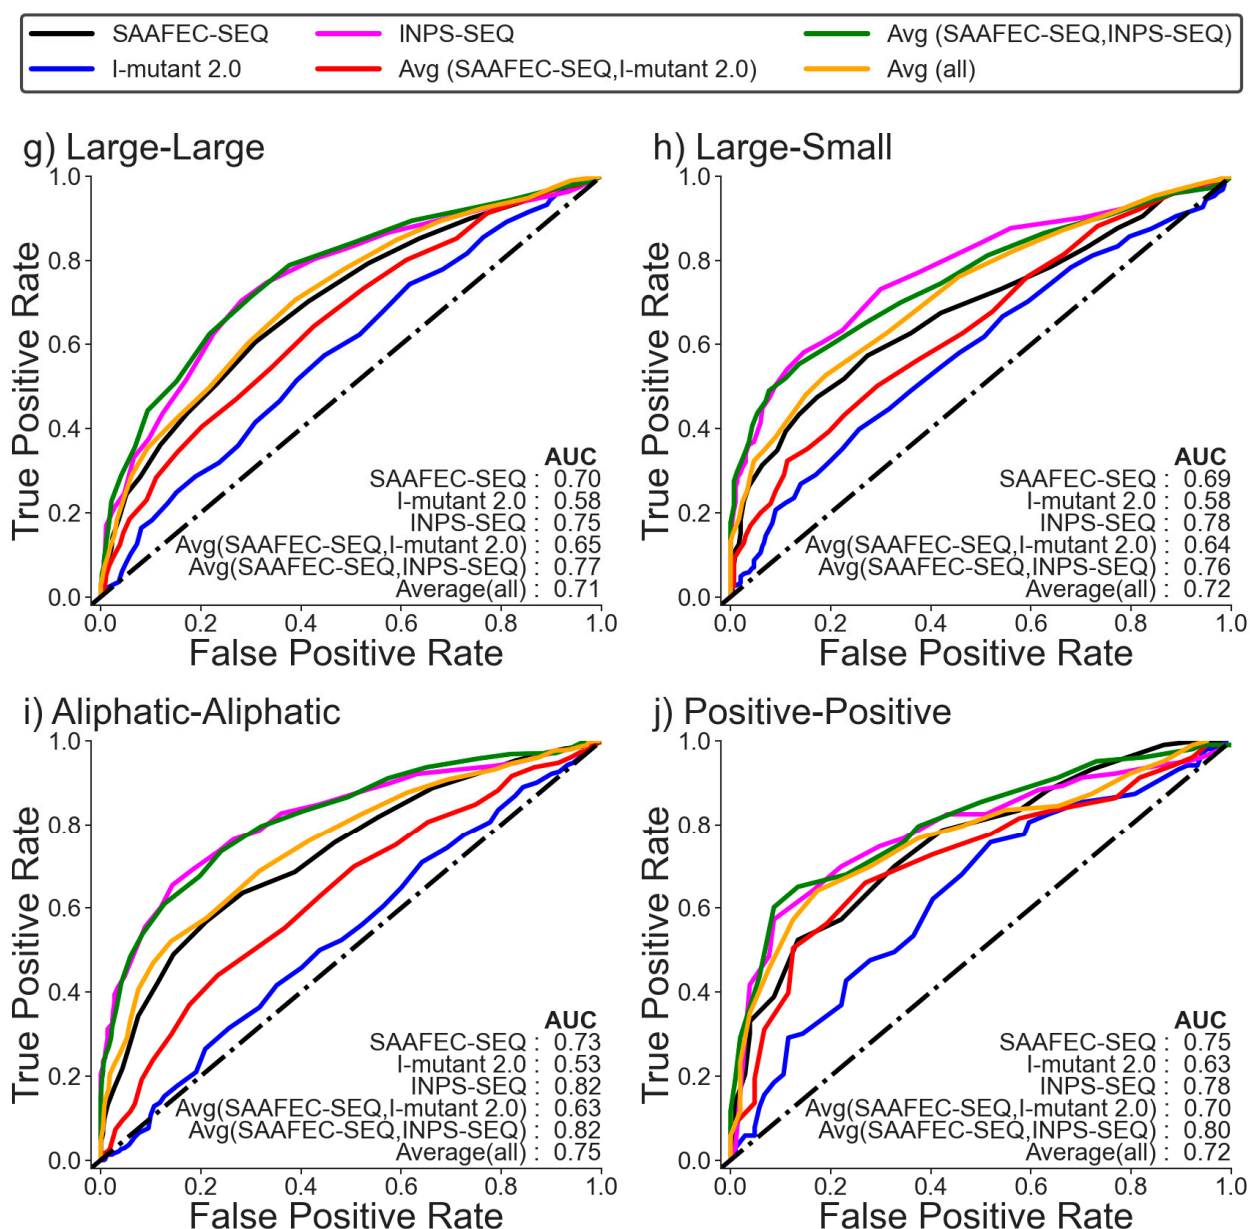

Figure S4. ROC curve for Monogenic Disorder Dataset 2 (including likely cases) for different categories of amino acid mutations. The amino acids according to their chemical properties are categorised as follows: Ala, Cys, Gly, Ile, Leu, Met, Phe, Pro, Trp, and Val are categorised as hydrophobic. Asp, Glu, Lys, Arg, His, Asn, Gln, Ser, Thr, and Tyr are categorised as polar. His, Phe, Trp, and Tyr as aromatic. Ala, Ile, Lys, Leu, Met, Pro, and Val as aliphatic. His, Lys, Arg as positive. Asp, and Glu as negative. Ala, Cys, Gly, Ser, Asn, Asp, Pro, Thr, and Val as small. And Arg, Gln, Glu, His, Ile, Leu, Lys, Met, Phe, Trp, and Tyr as large amino acids.

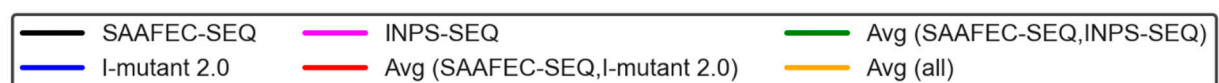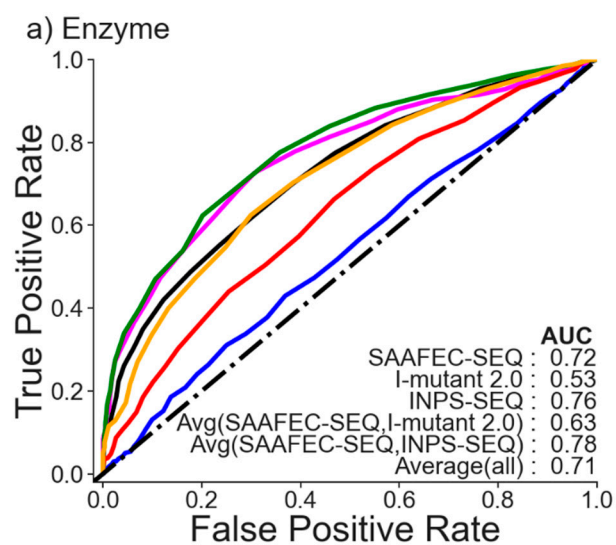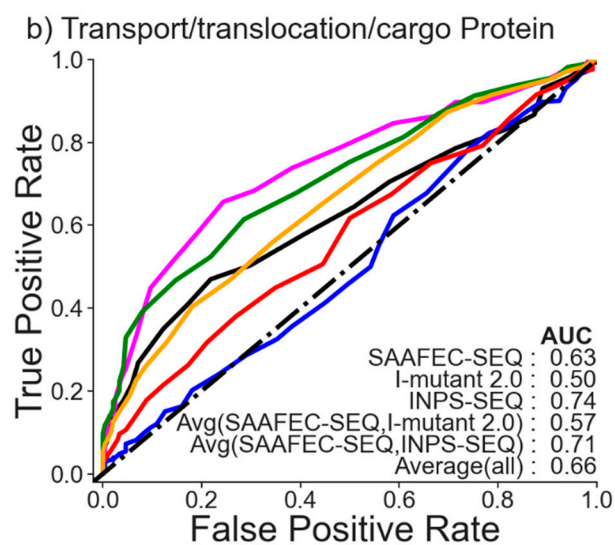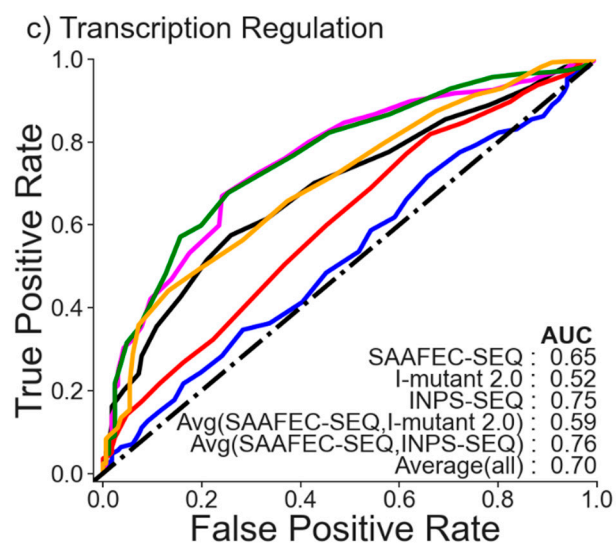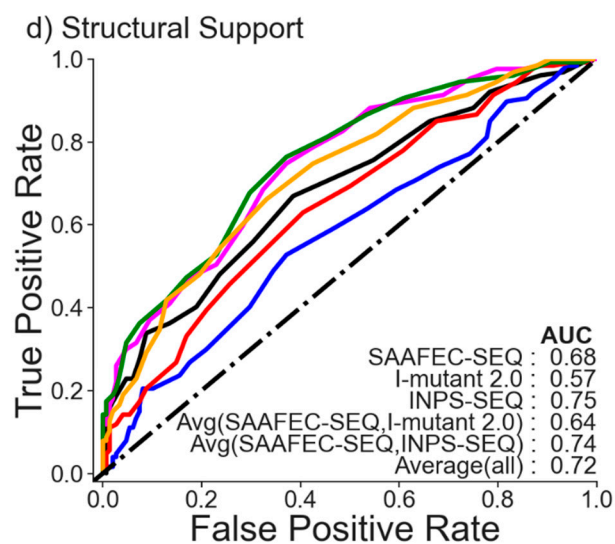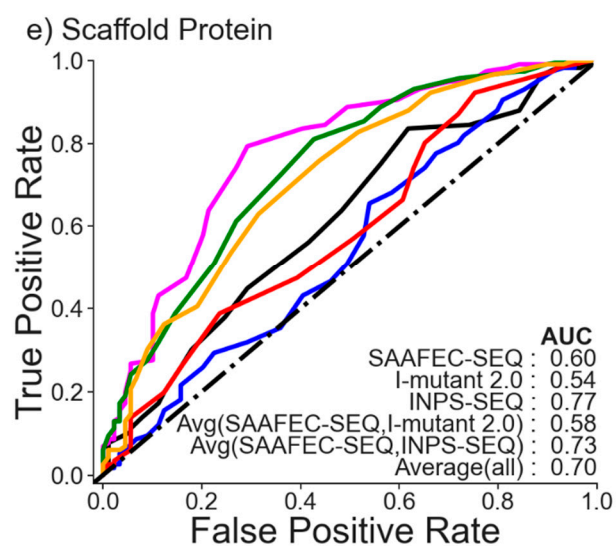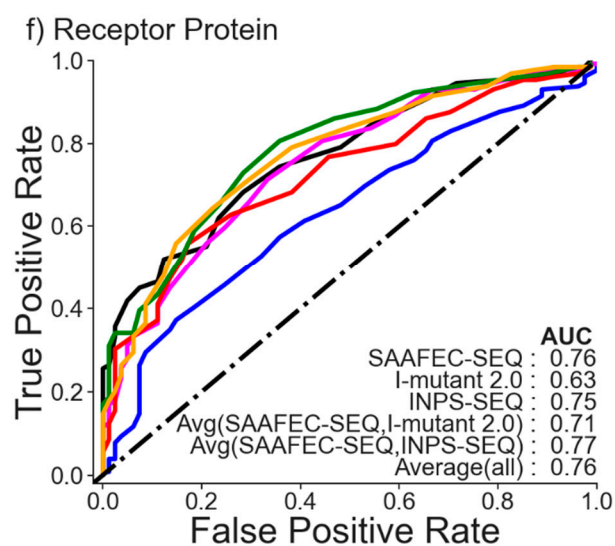



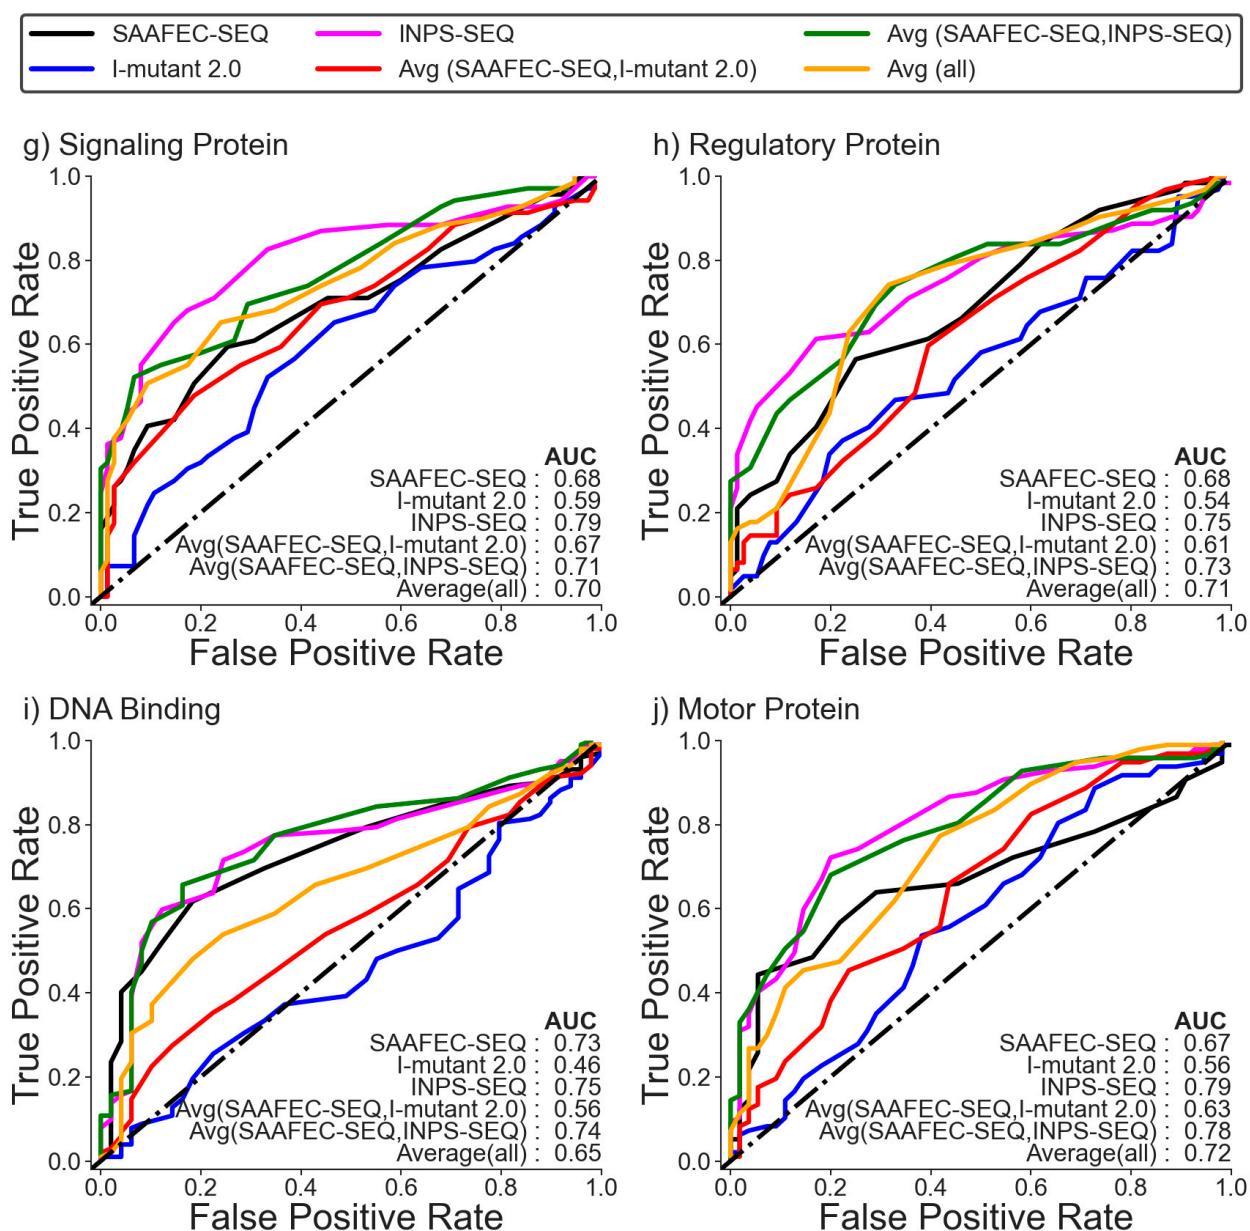

Figure S5. ROC curve for Monogenic Disorder Dataset 2 (including likely cases) for different functional categories.

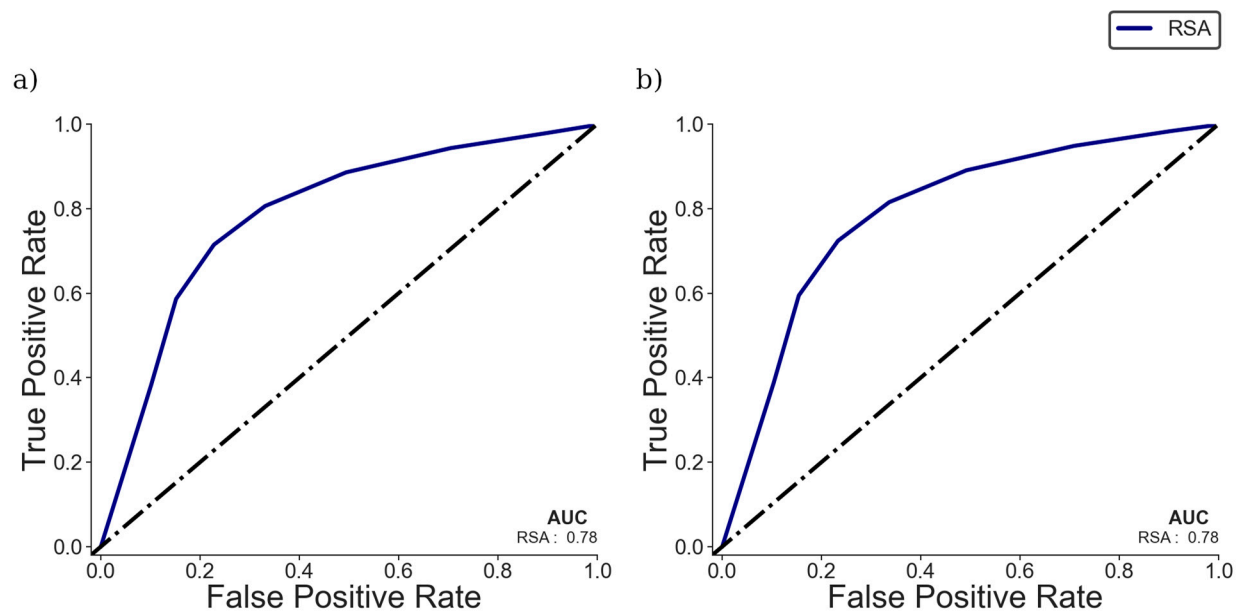

Figure S6. ROC curve for monogenic disorder dataset using Relative Surface Area (RSA) of amino acid. (a) Monogenic Disorder Dataset 1 (no likely cases) (b) Monogenic Disorder Dataset 2 (including likely cases).

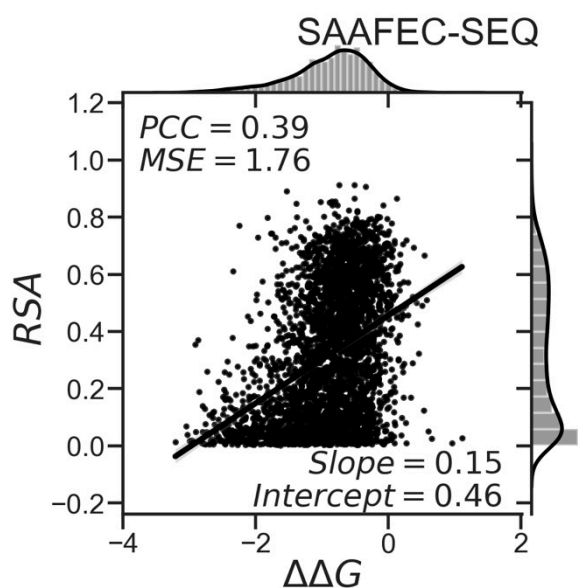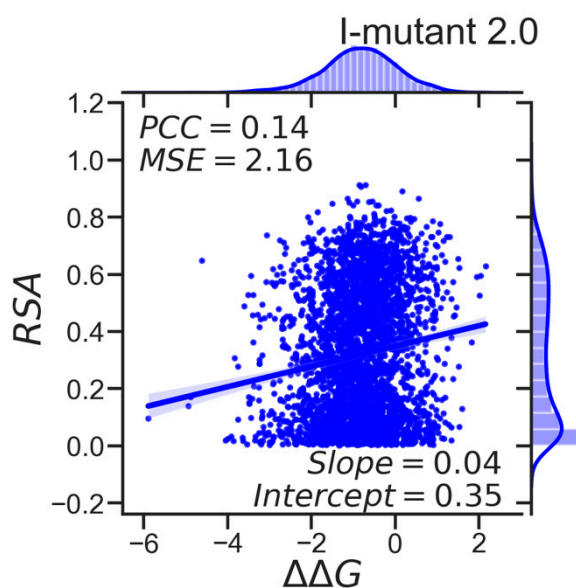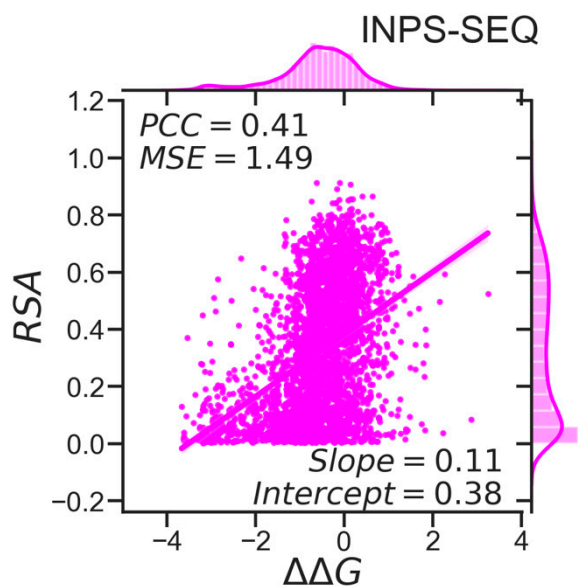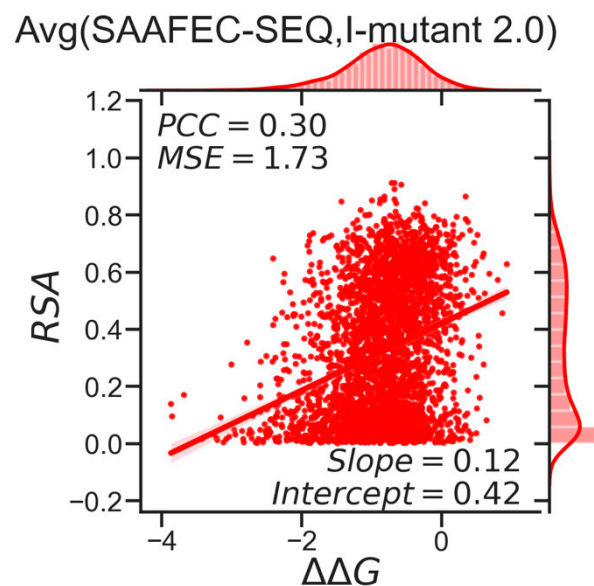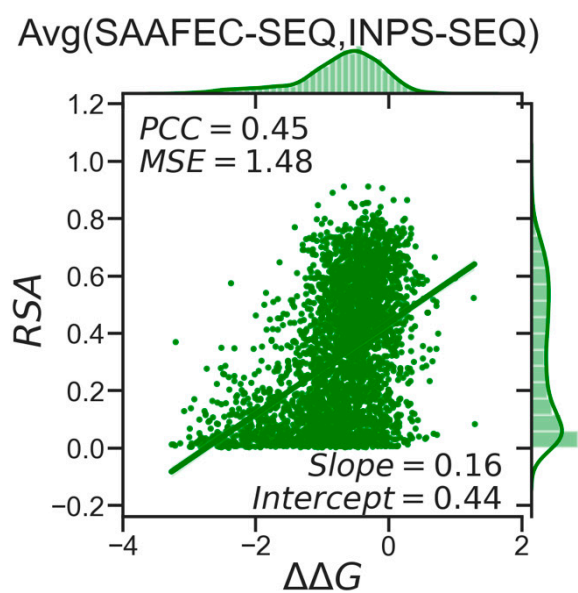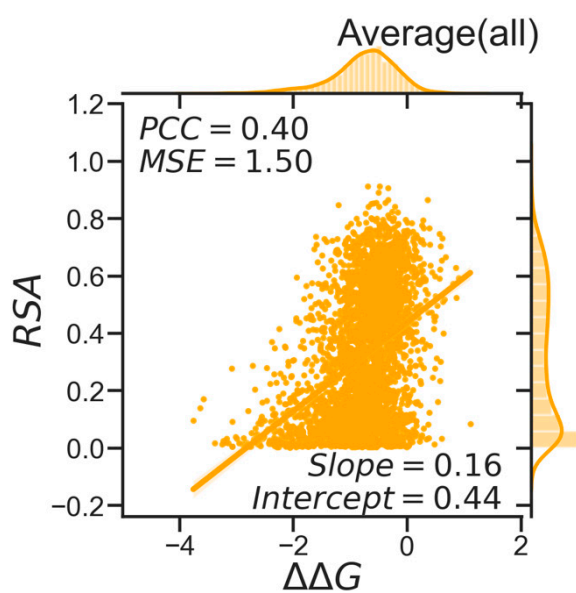

(a)

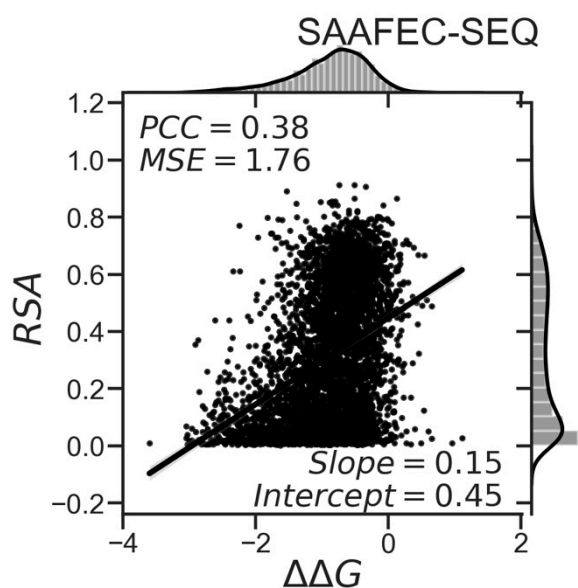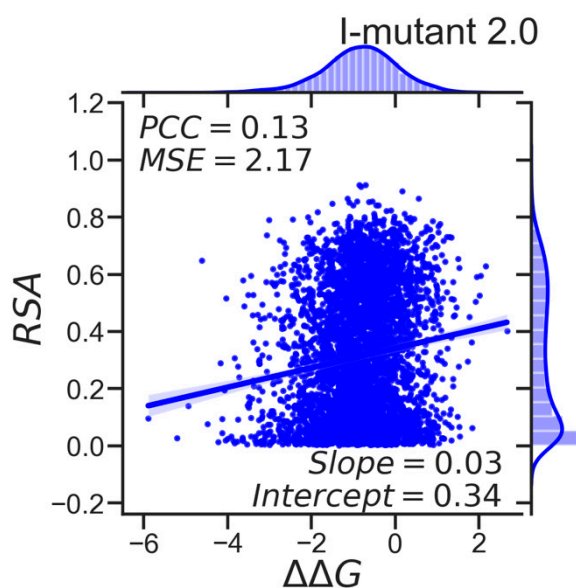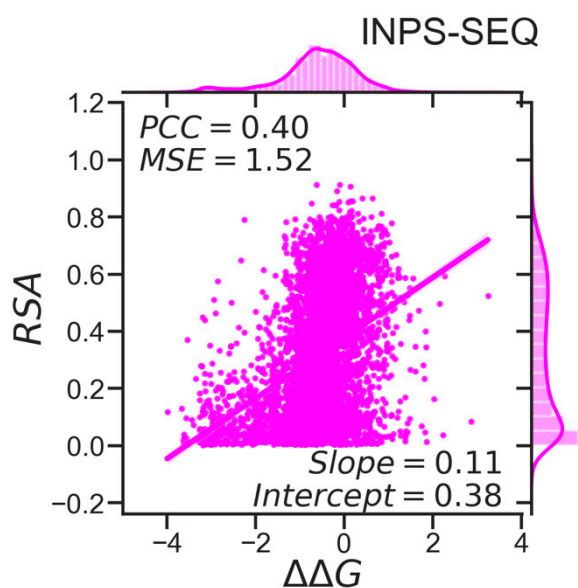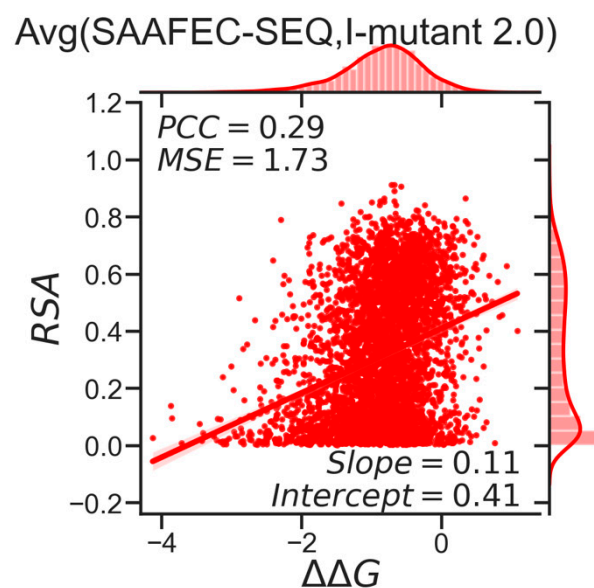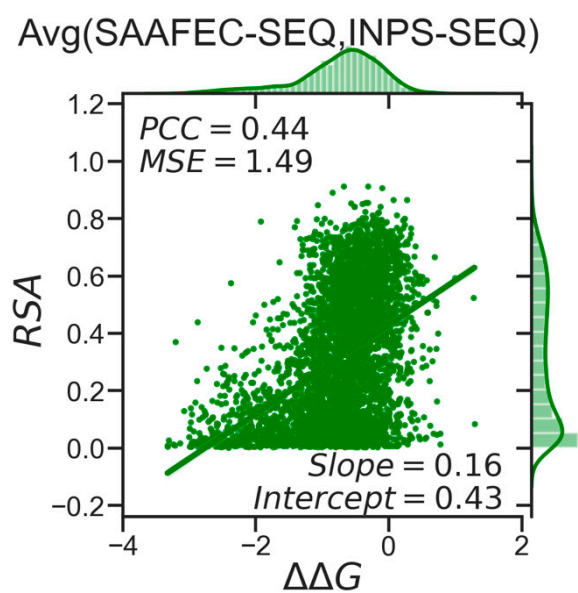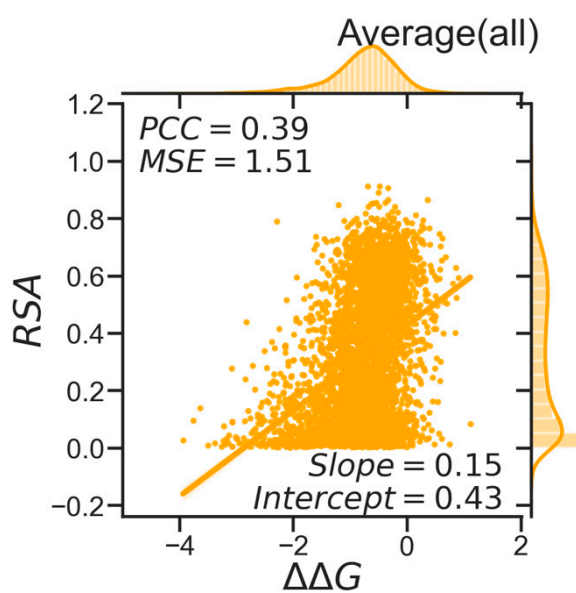

(b)

Figure S7. (a). Plots of  $\Delta\Delta G$  against RSA for Monogenic Disorder Dataset 1 (no likely cases). (b). Plots of  $\Delta\Delta G$  against RSA for Monogenic Disorder Dataset 2 (including likely cases).

## Supplementary Tables

Table S1. Total number of amino acid mutations based on chemical nature of amino acid mutations in monogenic disorder database.

| Se. No. | Type of amino acid mutation | Dataset 1 |            |       | Dataset 2 |            |       |
|---------|-----------------------------|-----------|------------|-------|-----------|------------|-------|
|         |                             | Benign    | Pathogenic | Total | Benign    | Pathogenic | Total |
| 1.      | Hydrophobic-Hydrophobic     | 424       | 460        | 884   | 528       | 605        | 1133  |
| 2.      | Hydrophobic-Polar           | 268       | 529        | 797   | 333       | 685        | 1018  |
| 3.      | Polar-Polar                 | 436       | 465        | 901   | 548       | 626        | 1174  |
| 4.      | Polar-Hydrophobic           | 277       | 480        | 757   | 354       | 643        | 997   |
| 5.      | Small-Small                 | 478       | 463        | 941   | 609       | 592        | 1201  |
| 6.      | Small-Large                 | 307       | 494        | 801   | 384       | 658        | 1042  |
| 7.      | Large-Large                 | 370       | 514        | 884   | 470       | 709        | 1179  |
| 8.      | Large-Small                 | 250       | 463        | 713   | 300       | 600        | 900   |
| 9.      | Aliphatic-Aliphatic         | 352       | 301        | 653   | 441       | 382        | 823   |
| 10.     | Aliphatic-Aromatic          | 25        | 34         | 59    | 33        | 47         | 80    |
| 11.     | Aromatic-Aromatic           | 24        | 18         | 42    | 29        | 26         | 55    |
| 12.     | Aromatic-Aliphatic          | 17        | 36         | 53    | 20        | 58         | 78    |
| 13.     | Positive-Positive           | 88        | 69         | 157   | 104       | 103        | 207   |
| 14.     | Positive-Negative           | 19        | 21         | 40    | 23        | 24         | 47    |
| 15.     | Negative-Negative           | 26        | 15         | 41    | 36        | 15         | 51    |
| 16.     | Negative-Positive           | 23        | 67         | 90    | 33        | 90         | 123   |

Table S2. Total number of amino acid mutations based on functional annotation of proteins in monogenic disorder database.

| Se. No. | Functional Class                      | No. of entries in Dataset 1 | No. of entries in Dataset 2 |
|---------|---------------------------------------|-----------------------------|-----------------------------|
| 1.      | Enzyme                                | 1295                        | 1646                        |
| 2.      | Transport/translocation/cargo Protein | 445                         | 570                         |
| 3.      | Transcription Regulation              | 343                         | 420                         |
| 4.      | Structural Support                    | 224                         | 275                         |
| 5.      | Scaffold Protein                      | 152                         | 205                         |
| 6.      | Receptor Protein                      | 141                         | 210                         |
| 7.      | Signalling Protein                    | 128                         | 144                         |
| 8.      | Regulatory Protein                    | 112                         | 138                         |
| 9.      | DNA Binding                           | 90                          | 151                         |
| 10.     | Motor Protein                         | 87                          | 152                         |
| 11.     | Secretory Proteins                    | 74                          | 80                          |
| 12.     | Adhesion Protein                      | 66                          | 87                          |
| 13.     | Chaperons                             | 66                          | 74                          |
| 14.     | Membrane Protein                      | 32                          | 40                          |
| 15.     | RNA Binding                           | 31                          | 50                          |
| 16.     | Antigen-Antibody                      | 14                          | 18                          |
| 17.     | Miscellaneous                         | 39                          | 62                          |
